# Supplementary material for: The in Vivo Toxicity of Hydroxyurea Depends on Its Direct Target Catalase
Source: PubMed Central journal article supplement — J Biol Chem. 2010 May 7;285(28):21411–5. doi: 10.1074/jbc.M110.103564 (PMC2898382; doi:10.1074/jbc.m110.103564), 2010-05-07
Supplement: supp_M110.103564_jbc.M110.103564-1.pdf [file supp_M110.103564_jbc.M110.103564-1.pdf]

## SUPPLEMENTAL INFORMATION

Table S1. Catalase activity in patient blood samples

| <b>Diagnosis</b> | <b>HU</b> | <b>Activity</b> | <b>SEM</b> |
|------------------|-----------|-----------------|------------|
| Normal           | No        | 0,62            | 0,04       |
| Normal           | No        | 0,42            | 0,07       |
| Normal           | No        | 1,23            | 0,11       |
| Normal           | No        | 0,33            | 0,01       |
| Normal           | No        | 0,54            | 0,02       |
| Normal           | No        | 0,60            | 0,01       |
| Normal           | No        | 0,44            | 0,01       |
| Normal           | No        | 1,82            | 0,03       |
| Normal           | No        | 1,38            | 0,02       |
| Normal           | No        | 1,43            | 0,01       |
| Normal           | No        | 0,57            | 0,01       |
| Normal           | No        | 1,31            | 0,08       |
| Normal           | No        | 1,45            | 0,05       |
| Normal           | No        | 1,53            | 0,06       |
| Normal           | No        | 0,83            | 0,03       |
| Normal           | No        | 1,49            | 0,04       |
| CML              | No        | 4,62            | 0,75       |
| CML              | No        | 4,65            | 0,26       |
| CML              | Yes       | 0,69            | 0,02       |
| CML              | No        | 4,39            | 0,16       |
| CML              | No        | 4,79            | 0,13       |
| CML              | No        | 0,65            | 0,02       |
| CML              | Yes       | 0,60            | 0,01       |
| CML              | No        | 0,54            | 0,01       |
| AML              | NA        | 2,14            | 0,02       |
| AML              | NA        | 1,31            | 0,05       |
| AML              | NA        | 0,39            | 0,01       |
| AML              | NA        | 1,88            | 0,09       |
| AML              | NA        | 1,62            | 0,08       |
| MF               | Yes       | 0,83            | 0,01       |
| MF               | No        | 2,63            | 0,05       |
| MM               | NA        | 0,37            | 0,03       |
| MM               | NA        | 1,35            | 0,06       |
| MP               | No        | 0,38            | 0,01       |
| MP               | No        | 0,16            | 0,14       |
| MP               | No        | 1,42            | 0,03       |
| MP               | Yes       | 1,51            | 0,03       |
| MP               | No        | 0,42            | 0,01       |

table S1 continued...

|                          |     |      |      |
|--------------------------|-----|------|------|
| PV                       | NA  | 0,23 | 0,03 |
| PV                       | NA  | 0,50 | 0,03 |
| PV                       | NA  | 0,62 | 0,08 |
| PV (JAK2 positive)       | No  | 0,45 | 0,02 |
| PV (JAK2 positive)       | No  | 0,36 | 0,01 |
| PV                       | No  | 0,88 | 0,07 |
| PV (JAK2 positive)       | No  | 0,24 | 0,01 |
| PV                       | No  | 0,81 | 0,01 |
| PV                       | Yes | 0,62 | 0,02 |
| PV                       | Yes | 1,61 | 0,02 |
| TC                       | NA  | 0,91 | 0,04 |
| TC                       | NA  | 1,14 | 0,06 |
| TC                       | NA  | 1,02 | 0,08 |
| TC (JAK2 positive)       | No  | 0,48 | 0,01 |
| TC                       | No  | 0,93 | 0,07 |
| TC                       | Yes | 1,26 | 0,01 |
| TC                       | Yes | 1,39 | 0,01 |
| TC                       | No  | 0,23 | 0,01 |
| CLL                      | NA  | 0,94 | 0,03 |
| CLL                      | NA  | 0,43 | 0,02 |
| CLL                      | NA  | 0,40 | 0,02 |
| CLL                      | NA  | 0,51 | 0,02 |
| CLL                      | No  | 0,58 | 0,02 |
| L (diffuse large B-cell) | No  | 0,85 | 0,02 |
| L (marginal zone)        | No  | 0,67 | 0,02 |
| L (follicular)           | No  | 1,96 | 0,09 |
| L (follicular)           | No  | 2,04 | 0,06 |
| L (malignant)            | No  | 0,51 | 0,01 |
| L (non-Hodgkin's)        | NA  | 1,47 | 0,13 |
| L (non-Hodgkin's)        | NA  | 1,18 | 0,07 |

**Legend:**

|     |                                        |
|-----|----------------------------------------|
| CML | Chronic myeloid leukemia               |
| AML | Acute myeloid leukemia                 |
| MF  | Myelofibrosis                          |
| MM  | Myelomatosis                           |
| MP  | Unspecified myeloproliferative disease |
| PV  | Polycytaemia vera                      |
| TC  | Trombocytosis                          |
| CLL | Chronic lymphatic leukemia             |
| L   | Lymphoma                               |

Activity      Catalase activity normalized to the average of the Normal group.

SEM          Standard error of the mean

HU          Patients undergoing HU treatment at the time of sampling?  
 NA: information not available
